# Supplementary material for: Resting-state functional connectivity in combat veterans suffering from impulsive aggression
Source: PubMed Central journal article supplement — Soc Cogn Affect Neurosci. 2017 Oct 12;12(12):1881–9. doi: 10.1093/scan/nsx113 (PMC5716169; doi:10.1093/scan/nsx113), 2017-10-12
Supplement: nsx113_supp.pdf [file nsx113_supp.pdf]

**Supplementary Table 1.**

*Within-group results yielded by the permutation-based cluster analyses for the combat control group.*

| Seed-region | Cluster | Anatomical location                                                                                                                                                                                                                                                                                                                                                                                                                                                                                                                                                                                                                                                                                                                                                                                                                                                                                                                                                                                                                                                                                                                                                                                                                                                          | Brodmann areas                                                                                           | Center of gravity |     |     | Peak    |
|-------------|---------|------------------------------------------------------------------------------------------------------------------------------------------------------------------------------------------------------------------------------------------------------------------------------------------------------------------------------------------------------------------------------------------------------------------------------------------------------------------------------------------------------------------------------------------------------------------------------------------------------------------------------------------------------------------------------------------------------------------------------------------------------------------------------------------------------------------------------------------------------------------------------------------------------------------------------------------------------------------------------------------------------------------------------------------------------------------------------------------------------------------------------------------------------------------------------------------------------------------------------------------------------------------------------|----------------------------------------------------------------------------------------------------------|-------------------|-----|-----|---------|
|             |         |                                                                                                                                                                                                                                                                                                                                                                                                                                                                                                                                                                                                                                                                                                                                                                                                                                                                                                                                                                                                                                                                                                                                                                                                                                                                              |                                                                                                          | x                 | y   | z   | z-score |
| BLA (left)  | 1       | Frontal superior ( <i>bilateral</i> ), frontal inferior orbital ( <i>left</i> ), rolandic operculum ( <i>bilateral</i> ), olfactory cortex ( <i>bilateral</i> ), frontal superior medial ( <i>bilateral</i> ), frontal medial orbital ( <i>bilateral</i> ), gyrus rectus ( <i>bilateral</i> ), anterior OFC ( <i>left</i> ), posterior OFC ( <i>bilateral</i> ), lateral OFC ( <i>left</i> ), insula ( <i>bilateral</i> ), ACC ( <i>bilateral</i> ), MCC ( <i>bilateral</i> ), PCC ( <i>bilateral</i> ), hippocampus ( <i>bilateral</i> ), parahippocampal gyrus ( <i>bilateral</i> ), amygdala ( <i>bilateral</i> ), calcarine cortex ( <i>bilateral</i> ), cuneus ( <i>left</i> ), lingual gyrus ( <i>bilateral</i> ), fusiform gyrus ( <i>bilateral</i> ), precuneus ( <i>bilateral</i> ), caudate ( <i>bilateral</i> ), putamen ( <i>bilateral</i> ), thalamus ( <i>bilateral</i> ), Heschl's gyrus ( <i>bilateral</i> ), temporal superior ( <i>bilateral</i> ), temporal pole superior ( <i>bilateral</i> ), temporal middle ( <i>bilateral</i> ), temporal pole middle ( <i>bilateral</i> ), temporal inferior ( <i>bilateral</i> ), cerebellum III ( <i>bilateral</i> ) <sup>1</sup> , cerebellum IV/IV ( <i>bilateral</i> ) <sup>1</sup> , vermis IV/V <sup>1</sup> | 8, 9, 10, 11, 17, 18, 19, 20, 21, 22, 23, 24, 25, 26, 27, 28, 29, 30, 32, 34, 35, 36, 37, 38, 41, 47, 48 | -22               | -4  | -14 | 23.364  |
|             | 2       | Cuneus ( <i>bilateral</i> ), occipital superior ( <i>bilateral</i> ), occipital middle ( <i>right</i> ), postcentral gyrus ( <i>right</i> ), parietal superior ( <i>bilateral</i> ), parietal inferior ( <i>right</i> ), supramarginal gyrus ( <i>right</i> ), angular gyrus ( <i>right</i> ), precuneus                                                                                                                                                                                                                                                                                                                                                                                                                                                                                                                                                                                                                                                                                                                                                                                                                                                                                                                                                                     | 2, 5, 7, 18, 19, 23, 39, 40, 41, 42, 48                                                                  | 50                | -44 | 54  | -9.562  |

---

|    |                                                                                                                                                                                                                                                                                           |                               |     |     |    |        |
|----|-------------------------------------------------------------------------------------------------------------------------------------------------------------------------------------------------------------------------------------------------------------------------------------------|-------------------------------|-----|-----|----|--------|
|    | <i>(bilateral)</i> , temporal superior <i>(right)</i>                                                                                                                                                                                                                                     |                               |     |     |    |        |
| 3  | Precentral gyrus <i>(bilateral)</i> , supplementary motor area <i>(bilateral)</i> , MCC <i>(bilateral)</i> , postcentral gyrus <i>(left)</i> , parietal inferior <i>(left)</i> , supramarginal gyrus <i>(left)</i> , precuneus <i>(bilateral)</i> , paracentral lobule <i>(bilateral)</i> | 1, 2, 3, 4, 5, 6, 23, 40, 43  | 6   | -24 | 62 | 9.083  |
| 4  | Supplementary motor area <i>(bilateral)</i> , frontal superior medial <i>(bilateral)</i> , MCC <i>(bilateral)</i>                                                                                                                                                                         | 6, 8, 24, 32                  | 6   | 24  | 46 | -8.863 |
| 5  | Precentral gyrus <i>(right)</i> , frontal middle <i>(right)</i> , postcentral gyrus <i>(right)</i>                                                                                                                                                                                        | 3, 4, 6                       | 42  | -20 | 62 | 8.776  |
| 6  | Frontal superior <i>(right)</i> , frontal middle <i>(right)</i> , frontal inferior triangularis <i>(right)</i> , frontal inferior orbital <i>(right)</i> , anterior OFC <i>(right)</i>                                                                                                    | 9, 10, 11, 44, 45, 46, 47, 48 | 38  | 52  | 26 | -8.519 |
| 7  | Frontal superior <i>(left)</i> , frontal middle <i>(left)</i> , frontal inferior triangularis <i>(left)</i>                                                                                                                                                                               | 9, 10, 44, 45, 46             | -38 | 52  | 18 | -7.976 |
| 8  | Precentral gyrus <i>(right)</i> , Frontal superior <i>(right)</i> , frontal middle <i>(right)</i> , supplementary motor area <i>(right)</i>                                                                                                                                               | 6, 8, 9                       | 38  | 4   | 50 | -7.768 |
| 9  | Parietal superior <i>(left)</i> , parietal inferior <i>(left)</i> , supramarginal gyrus <i>(left)</i> , angular gyrus <i>(left)</i> , temporal superior <i>(left)</i>                                                                                                                     | 2, 7, 39, 40, 48              | -54 | -48 | 46 | -6.893 |
| 10 | Occipital middle <i>(left)</i> , angular gyrus <i>(left)</i> , temporal middle <i>(left)</i>                                                                                                                                                                                              | 19, 21, 22, 37, 39            | -42 | -64 | 22 | 6.263  |
| 11 | Frontal medial orbital <i>(bilateral)</i> , gyrus rectus <i>(bilateral)</i> , ACC <i>(bilateral)</i>                                                                                                                                                                                      | 10, 11, 24, 25, 32            | 2   | 40  | -2 | 5.721  |
| 12 | Calcarine cortex <i>(bilateral)</i> , lingual gyrus <i>(bilateral)</i>                                                                                                                                                                                                                    | 17, 18                        | 18  | -80 | -2 | -4.440 |
| 13 | Frontal inferior operculum <i>(right)</i> , frontal inferior orbital <i>(right)</i> , insula <i>(right)</i>                                                                                                                                                                               | 38, 47, 48                    | 34  | 28  | -6 | -4.427 |

---

|             |   |                                                                                                                                                                                                                                                                                                                                                                                                                                                                                                                                                                                                                                                                                                                                                                                                                                                                                                                                                                                                                                                                                                                                                                       |                                                                                                |    |     |     |        |
|-------------|---|-----------------------------------------------------------------------------------------------------------------------------------------------------------------------------------------------------------------------------------------------------------------------------------------------------------------------------------------------------------------------------------------------------------------------------------------------------------------------------------------------------------------------------------------------------------------------------------------------------------------------------------------------------------------------------------------------------------------------------------------------------------------------------------------------------------------------------------------------------------------------------------------------------------------------------------------------------------------------------------------------------------------------------------------------------------------------------------------------------------------------------------------------------------------------|------------------------------------------------------------------------------------------------|----|-----|-----|--------|
| BLA (right) | 1 | Rolandic operculum ( <i>bilateral</i> ), olfactory cortex ( <i>bilateral</i> ), frontal medial orbital ( <i>bilateral</i> ), gyrus rectus ( <i>bilateral</i> ), medial OFC ( <i>bilateral</i> ), posterior OFC ( <i>bilateral</i> ), insula ( <i>bilateral</i> ), ACC ( <i>left</i> ), MCC ( <i>left</i> ), PCC ( <i>bilateral</i> ), hippocampus ( <i>bilateral</i> ), parahippocampal gyrus ( <i>bilateral</i> ), amygdala ( <i>bilateral</i> ), calcarine cortex ( <i>bilateral</i> ), lingual gyrus ( <i>bilateral</i> ), fusiform gyrus ( <i>bilateral</i> ), postcentral gyrus ( <i>right</i> ), precuneus ( <i>bilateral</i> ), caudate ( <i>bilateral</i> ), putamen ( <i>bilateral</i> ), pallidum ( <i>right</i> ), thalamus ( <i>bilateral</i> ), Heschl's gyrus ( <i>right</i> ), temporal superior ( <i>bilateral</i> ), temporal pole superior ( <i>bilateral</i> ), temporal middle ( <i>bilateral</i> ), temporal pole middle ( <i>bilateral</i> ), temporal inferior ( <i>bilateral</i> ), cerebellum III ( <i>bilateral</i> ) <sup>1</sup> , cerebellum IV/V ( <i>bilateral</i> ) <sup>1</sup> , vermis III <sup>1</sup> , vermis IV/V <sup>1</sup> | 11, 17, 18, 19, 20, 21, 22, 23, 25, 26, 27, 28, 29, 30, 34, 35, 36, 37, 38, 41, 42, 43, 47, 48 | 22 | -4  | -14 | 26.118 |
|             | 2 | Precentral gyrus ( <i>right</i> ), frontal superior ( <i>right</i> ), frontal middle ( <i>right</i> ), supplementary motor area ( <i>bilateral</i> ), MCC ( <i>bilateral</i> ), postcentral gyrus ( <i>right</i> ), parietal superior ( <i>right</i> ), parietal inferior ( <i>right</i> ), precuneus ( <i>bilateral</i> ), paracentral lobule ( <i>bilateral</i> )                                                                                                                                                                                                                                                                                                                                                                                                                                                                                                                                                                                                                                                                                                                                                                                                   | 2, 3, 4, 5, 6, 7, 23, 24, 40, 43                                                               | 6  | -20 | 58  | 8.244  |
|             | 3 | Cuneus ( <i>bilateral</i> ), occipital superior ( <i>left</i> ), parietal superior ( <i>bilateral</i> ), precuneus ( <i>bilateral</i> )                                                                                                                                                                                                                                                                                                                                                                                                                                                                                                                                                                                                                                                                                                                                                                                                                                                                                                                                                                                                                               | 5, 7, 18, 19                                                                                   | -6 | -80 | 50  | -8.009 |
|             | 4 | Precentral gyrus ( <i>left</i> ), frontal superior ( <i>bilateral</i> ), frontal middle ( <i>bilateral</i> ), frontal inferior operculum ( <i>left</i> ), frontal inferior triangularis ( <i>left</i> ), frontal inferior orbital ( <i>left</i> ), supplementary motor area ( <i>bilateral</i> ), frontal superior                                                                                                                                                                                                                                                                                                                                                                                                                                                                                                                                                                                                                                                                                                                                                                                                                                                    | 6, 8, 9, 10, 11, 24, 32, 44, 45, 46, 47, 48                                                    | -2 | 24  | 50  | -7.671 |

---

|    |                                                                                                                                                                                                                                                                                                                                          |                                                          |     |     |     |        |
|----|------------------------------------------------------------------------------------------------------------------------------------------------------------------------------------------------------------------------------------------------------------------------------------------------------------------------------------------|----------------------------------------------------------|-----|-----|-----|--------|
|    | medial ( <i>bilateral</i> ), medial OFC ( <i>left</i> ), anterior OFC ( <i>left</i> ), lateral OFC ( <i>left</i> ),<br>MCC ( <i>right</i> )                                                                                                                                                                                              |                                                          |     |     |     |        |
| 5  | Frontal superior ( <i>right</i> ), frontal middle ( <i>right</i> )                                                                                                                                                                                                                                                                       | 9, 45, 46                                                | 42  | 44  | 26  | -6.784 |
| 6  | Parietal superior ( <i>left</i> ), parietal inferior ( <i>left</i> ), supramarginal gyrus ( <i>left</i> ),<br>angular gyrus ( <i>left</i> )                                                                                                                                                                                              | 2, 7, 39, 40, 48                                         | -42 | -44 | 46  | -6.618 |
| 7  | Precentral gyrus ( <i>left</i> ), postcentral gyrus ( <i>left</i> ), parietal superior ( <i>left</i> ),<br>parietal inferior ( <i>left</i> ), paracentral lobule ( <i>left</i> )                                                                                                                                                         | 1, 2, 3, 4, 6                                            | -34 | -24 | 70  | 6.600  |
| 8  | Frontal superior ( <i>right</i> ), frontal middle ( <i>right</i> ), frontal medial orbital ( <i>right</i> ),<br>anterior OFC ( <i>right</i> )                                                                                                                                                                                            | 10, 11, 46, 47                                           | 26  | 64  | -10 | -6.505 |
| 9  | Frontal superior ( <i>left</i> ), frontal middle ( <i>left</i> ), frontal inferior operculum ( <i>left</i> ),<br>frontal inferior triangularis ( <i>left</i> )                                                                                                                                                                           | 9, 10, 44, 45, 46,<br>48                                 | -38 | 52  | 18  | -6.502 |
| 10 | Frontal superior ( <i>bilateral</i> ), frontal superior medial ( <i>bilateral</i> ), frontal<br>medial orbital ( <i>bilateral</i> ), gyrus rectus ( <i>bilateral</i> ), ACC ( <i>bilateral</i> )                                                                                                                                         | 9, 10, 11, 25, 32                                        | 6   | 56  | 22  | 6.495  |
| 11 | Rolandic operculum ( <i>left</i> ), insula ( <i>left</i> ), Heschl's gyrus ( <i>left</i> ), temporal<br>superior ( <i>left</i> )                                                                                                                                                                                                         | 21, 22, 41, 48                                           | -10 | -16 | 22  | 6.136  |
| 12 | Parietal superior ( <i>right</i> ), parietal inferior ( <i>right</i> ), supramarginal gyrus ( <i>right</i> ),<br>angular gyrus ( <i>right</i> )                                                                                                                                                                                          | 2, 40, 48                                                | 46  | -48 | 58  | -5.871 |
| 1  | Frontal inferior operculum ( <i>left</i> ), frontal inferior triangularis ( <i>bilateral</i> ),<br>CeM ( <i>left</i> )<br>rolandic operculum ( <i>left</i> ), olfactory cortex ( <i>bilateral</i> ), gyrus rectus<br>( <i>bilateral</i> ), posterior OFC ( <i>left</i> ), insula ( <i>bilateral</i> ), hippocampus ( <i>bilateral</i> ), | 11, 20, 25, 27, 28,<br>30, 34, 35, 36, 37,<br>38, 47, 48 | -22 | -12 | -10 | 29.149 |

---

|                      |                                                                                                                                                                                                                                                                                                                                                                                                                                                                                                                                                                                                                                                                                                                                                                                                                                                                                                            |                                                                                      |     |     |     |        |
|----------------------|------------------------------------------------------------------------------------------------------------------------------------------------------------------------------------------------------------------------------------------------------------------------------------------------------------------------------------------------------------------------------------------------------------------------------------------------------------------------------------------------------------------------------------------------------------------------------------------------------------------------------------------------------------------------------------------------------------------------------------------------------------------------------------------------------------------------------------------------------------------------------------------------------------|--------------------------------------------------------------------------------------|-----|-----|-----|--------|
|                      | parahippocampal gyrus ( <i>bilateral</i> ), amygdala ( <i>bilateral</i> ), lingual gyrus ( <i>bilateral</i> ), caudate ( <i>bilateral</i> ), putamen ( <i>bilateral</i> ), pallidum ( <i>bilateral</i> ), thalamus ( <i>bilateral</i> ), Heschl's gyrus ( <i>left</i> ), temporal superior ( <i>bilateral</i> ), temporal pole superior ( <i>bilateral</i> ), vermis III, vermis IV/V                                                                                                                                                                                                                                                                                                                                                                                                                                                                                                                      |                                                                                      |     |     |     |        |
| 2                    | Cerebellum III ( <i>left</i> ), cerebellum IV/V ( <i>bilateral</i> ), cerebellum VI ( <i>bilateral</i> ), vermis IV/V, vermis X                                                                                                                                                                                                                                                                                                                                                                                                                                                                                                                                                                                                                                                                                                                                                                            | 18 <sup>2</sup> , 19 <sup>2</sup> , 30 <sup>2</sup> , 37 <sup>2</sup>                | -14 | -40 | -22 | 5.087  |
| 1                    | Frontal middle ( <i>right</i> ), frontal inferior operculum ( <i>right</i> ), frontal inferior triangularis ( <i>right</i> ), frontal inferior orbital ( <i>right</i> ), rolandic operculum ( <i>right</i> ), olfactory cortex ( <i>bilateral</i> ), gyrus rectus ( <i>right</i> ), posterior OFC ( <i>right</i> ), insula ( <i>bilateral</i> ), PCC ( <i>right</i> ), hippocampus ( <i>bilateral</i> ), parahippocampal gyrus ( <i>right</i> ), amygdala ( <i>bilateral</i> ), lingual gyrus ( <i>right</i> ), postcentral gyrus ( <i>right</i> ), supramarginal gyrus ( <i>right</i> ), precuneus ( <i>right</i> ), caudate ( <i>bilateral</i> ), putamen ( <i>bilateral</i> ), pallidum ( <i>bilateral</i> ), thalamus ( <i>bilateral</i> ), Heschl's gyrus ( <i>bilateral</i> ), temporal superior ( <i>bilateral</i> ), temporal superior pole ( <i>bilateral</i> ), temporal middle ( <i>right</i> ) | 2, 6, 11, 20, 21, 22, 25, 27, 28, 29, 30, 34, 35, 37, 38, 40, 41, 42, 44, 45, 47, 48 | 22  | -12 | -10 | 21.565 |
| CeM ( <i>right</i> ) |                                                                                                                                                                                                                                                                                                                                                                                                                                                                                                                                                                                                                                                                                                                                                                                                                                                                                                            |                                                                                      |     |     |     |        |
| 2                    | Frontal superior ( <i>right</i> ), frontal middle ( <i>right</i> )                                                                                                                                                                                                                                                                                                                                                                                                                                                                                                                                                                                                                                                                                                                                                                                                                                         | 9, 45, 46                                                                            | 34  | 40  | 30  | 5.950  |
| 3                    | Frontal superior ( <i>right</i> ), supplementary motor area ( <i>bilateral</i> ), frontal superior medial ( <i>left</i> ), ACC ( <i>right</i> ), MCC ( <i>bilateral</i> )                                                                                                                                                                                                                                                                                                                                                                                                                                                                                                                                                                                                                                                                                                                                  | 6, 8, 24, 32                                                                         | -6  | 4   | 50  | 5.701  |
| 4                    | Precentral gyrus ( <i>left</i> ), postcentral gyrus ( <i>left</i> ), parietal inferior ( <i>left</i> ), supramarginal gyrus ( <i>left</i> )                                                                                                                                                                                                                                                                                                                                                                                                                                                                                                                                                                                                                                                                                                                                                                | 2, 3, 4, 40, 48                                                                      | -42 | -32 | 58  | -5.088 |

|                     |   |                                                                                                                                                                                                                                                                                                                                                                                                                                                                                                                                                                                                                                                                                                                                                                                                                                                                                                                                                                                                                                                                                                                                                                                                                                   |                                                                                                                   |     |     |     |        |
|---------------------|---|-----------------------------------------------------------------------------------------------------------------------------------------------------------------------------------------------------------------------------------------------------------------------------------------------------------------------------------------------------------------------------------------------------------------------------------------------------------------------------------------------------------------------------------------------------------------------------------------------------------------------------------------------------------------------------------------------------------------------------------------------------------------------------------------------------------------------------------------------------------------------------------------------------------------------------------------------------------------------------------------------------------------------------------------------------------------------------------------------------------------------------------------------------------------------------------------------------------------------------------|-------------------------------------------------------------------------------------------------------------------|-----|-----|-----|--------|
|                     | 5 | Cerebellum IV/V ( <i>left</i> ), cerebellum IV ( <i>left</i> ), cerebellum IX ( <i>bilateral</i> ), vermis IX, vermis X                                                                                                                                                                                                                                                                                                                                                                                                                                                                                                                                                                                                                                                                                                                                                                                                                                                                                                                                                                                                                                                                                                           | 19 <sup>2</sup> , 37 <sup>2</sup>                                                                                 | -14 | -56 | -26 | 4.196  |
| ACC ( <i>left</i> ) | 1 | Precentral gyrus ( <i>left</i> ), frontal superior ( <i>bilateral</i> ), frontal middle ( <i>bilateral</i> ), frontal inferior operculum ( <i>right</i> ), frontal inferior triangularis ( <i>bilateral</i> ), frontal inferior orbital ( <i>bilateral</i> ), rolandic operculum ( <i>bilateral</i> ), supplementary motor area ( <i>bilateral</i> ), olfactory cortex ( <i>bilateral</i> ), frontal superior medial ( <i>bilateral</i> ), frontal medial orbital ( <i>bilateral</i> ), gyrus rectus ( <i>bilateral</i> ), medial OFC ( <i>left</i> ), anterior OFC ( <i>left</i> ), posterior OFC ( <i>left</i> ), insula ( <i>bilateral</i> ), ACC ( <i>bilateral</i> ), MCC ( <i>bilateral</i> ), hippocampus ( <i>left</i> ), amygdala ( <i>left</i> ), lingual gyrus ( <i>left</i> ), postcentral gyrus ( <i>bilateral</i> ), parietal superior ( <i>left</i> ), supramarginal gyrus ( <i>bilateral</i> ), precuneus ( <i>left</i> ), paracentral lobule ( <i>left</i> ), caudate ( <i>bilateral</i> ), putamen ( <i>bilateral</i> ), pallidum ( <i>bilateral</i> ), thalamus ( <i>bilateral</i> ), Heschl's gyrus ( <i>bilateral</i> ), temporal superior ( <i>bilateral</i> ), temporal pole superior ( <i>bilateral</i> ) | 1, 2, 3, 4, 5, 6, 7, 8, 9, 10, 11, 20, 21, 22, 23, 24, 25, 27, 30, 32, 34, 35, 36, 38, 41, 42, 43, 45, 46, 47, 48 | -2  | 12  | 2   | 14.848 |
|                     | 2 | MCC ( <i>right</i> ), PCC ( <i>right</i> ), calcarine cortex ( <i>right</i> ), cuneus ( <i>bilateral</i> ), occipital superior ( <i>bilateral</i> ), occipital middle ( <i>bilateral</i> ), occipital inferior ( <i>right</i> ), parietal superior ( <i>bilateral</i> ), parietal inferior ( <i>bilateral</i> ), angular gyrus ( <i>right</i> ), precuneus ( <i>bilateral</i> ), temporal middle ( <i>bilateral</i> )                                                                                                                                                                                                                                                                                                                                                                                                                                                                                                                                                                                                                                                                                                                                                                                                             | 7, 17, 18, 19, 21, 23, 26, 37, 39, 40, 48                                                                         | -34 | -84 | 18  | -6.273 |
|                     | 3 | Precentral gyrus ( <i>left</i> ), postcentral gyrus ( <i>left</i> ), parietal inferior ( <i>left</i> )                                                                                                                                                                                                                                                                                                                                                                                                                                                                                                                                                                                                                                                                                                                                                                                                                                                                                                                                                                                                                                                                                                                            | 2, 3, 4, 6, 43, 48                                                                                                | -46 | -12 | 34  | 6.005  |
|                     | 4 | Calcarine cortex ( <i>right</i> ), cuneus ( <i>right</i> ), occipital superior ( <i>right</i> ), occipital                                                                                                                                                                                                                                                                                                                                                                                                                                                                                                                                                                                                                                                                                                                                                                                                                                                                                                                                                                                                                                                                                                                        | 17, 18, 19, 23                                                                                                    | 18  | -60 | 22  | -5.013 |

|    |                                                                                                                                                                                                                                                                                                                                                                                                                                                                                                                                                                                                                                                                                                                                                                                                                                                                                                                                                                                                                                                                                                                                                                                                                                                              |                                                                                      |     |     |     |        |
|----|--------------------------------------------------------------------------------------------------------------------------------------------------------------------------------------------------------------------------------------------------------------------------------------------------------------------------------------------------------------------------------------------------------------------------------------------------------------------------------------------------------------------------------------------------------------------------------------------------------------------------------------------------------------------------------------------------------------------------------------------------------------------------------------------------------------------------------------------------------------------------------------------------------------------------------------------------------------------------------------------------------------------------------------------------------------------------------------------------------------------------------------------------------------------------------------------------------------------------------------------------------------|--------------------------------------------------------------------------------------|-----|-----|-----|--------|
|    | middle ( <i>right</i> ), precuneus ( <i>right</i> )                                                                                                                                                                                                                                                                                                                                                                                                                                                                                                                                                                                                                                                                                                                                                                                                                                                                                                                                                                                                                                                                                                                                                                                                          |                                                                                      |     |     |     |        |
| 5  | Precentral gyrus ( <i>right</i> ), postcentral gyrus ( <i>right</i> )                                                                                                                                                                                                                                                                                                                                                                                                                                                                                                                                                                                                                                                                                                                                                                                                                                                                                                                                                                                                                                                                                                                                                                                        | 3, 4, 6, 43                                                                          | 50  | 0   | 42  | 4.943  |
| 6  | Fusiform gyrus ( <i>left</i> ), temporal inferior ( <i>left</i> )                                                                                                                                                                                                                                                                                                                                                                                                                                                                                                                                                                                                                                                                                                                                                                                                                                                                                                                                                                                                                                                                                                                                                                                            | 20                                                                                   | -46 | -4  | -38 | 4.836  |
| 7  | MCC ( <i>left</i> ), parietal superior ( <i>left</i> ), precuneus ( <i>left</i> )                                                                                                                                                                                                                                                                                                                                                                                                                                                                                                                                                                                                                                                                                                                                                                                                                                                                                                                                                                                                                                                                                                                                                                            | 2, 5                                                                                 | -10 | -44 | 62  | 4.560  |
| 8  | Rolandic operculum ( <i>right</i> ), insula ( <i>right</i> ), hippocampus ( <i>right</i> ), putamen ( <i>right</i> ), Heschl's gyrus ( <i>right</i> ), temporal superior ( <i>right</i> )                                                                                                                                                                                                                                                                                                                                                                                                                                                                                                                                                                                                                                                                                                                                                                                                                                                                                                                                                                                                                                                                    | 20, 48                                                                               | 42  | -16 | -2  | 4.515  |
| 9  | Temporal middle ( <i>right</i> ), temporal inferior ( <i>right</i> )                                                                                                                                                                                                                                                                                                                                                                                                                                                                                                                                                                                                                                                                                                                                                                                                                                                                                                                                                                                                                                                                                                                                                                                         | 20, 37                                                                               | 58  | -48 | -22 | -4.415 |
| 10 | Precentral gyrus ( <i>right</i> ), postcentral gyrus ( <i>right</i> )                                                                                                                                                                                                                                                                                                                                                                                                                                                                                                                                                                                                                                                                                                                                                                                                                                                                                                                                                                                                                                                                                                                                                                                        | 4, 6                                                                                 | 26  | -28 | 70  | 4.307  |
| 1  | Frontal superior ( <i>right</i> ), frontal middle ( <i>right</i> ), frontal inferior operculum ( <i>right</i> ), frontal inferior triangularis ( <i>right</i> ), frontal inferior orbital ( <i>bilateral</i> ), rolandic operculum ( <i>right</i> ), supplementary motor area ( <i>bilateral</i> ), olfactory cortex ( <i>bilateral</i> ), frontal superior medial ( <i>bilateral</i> ), frontal medial orbital ( <i>bilateral</i> ), gyrus rectus ( <i>bilateral</i> ), medial OFC ( <i>bilateral</i> ), posterior OFC ( <i>bilateral</i> ), insula ( <i>bilateral</i> ), ACC ( <i>bilateral</i> ), MCC ( <i>bilateral</i> ), hippocampus ( <i>bilateral</i> ), parahippocampal gyrus ( <i>bilateral</i> ), amygdala ( <i>bilateral</i> ), lingual gyrus ( <i>bilateral</i> ), fusiform gyrus ( <i>left</i> ), postcentral gyrus ( <i>bilateral</i> ), supramarginal gyrus ( <i>bilateral</i> ), precuneus ( <i>bilateral</i> ), caudate ( <i>bilateral</i> ), putamen ( <i>bilateral</i> ), pallidum ( <i>bilateral</i> ), thalamus ( <i>bilateral</i> ), Heschl's gyrus ( <i>bilateral</i> ), temporal superior ( <i>bilateral</i> ), temporal superior pole ( <i>bilateral</i> ), cerebellum IV/V ( <i>left</i> ) <sup>1</sup> , vermis III <sup>1</sup> | 6, 9, 10, 11, 20, 22, 23, 24, 25, 27, 28, 30, 32, 34, 35, 36, 37, 38, 42, 46, 47, 48 | 2   | 8   | 2   | 16.457 |

ACC (*right*)

|                     |   |                                                                                                                                                                                                                                                                                                                                                                                                                                                                                                                                                                                                                                                                                                                                                                                                                                  |                                                                                                                                                       |     |     |     |        |
|---------------------|---|----------------------------------------------------------------------------------------------------------------------------------------------------------------------------------------------------------------------------------------------------------------------------------------------------------------------------------------------------------------------------------------------------------------------------------------------------------------------------------------------------------------------------------------------------------------------------------------------------------------------------------------------------------------------------------------------------------------------------------------------------------------------------------------------------------------------------------|-------------------------------------------------------------------------------------------------------------------------------------------------------|-----|-----|-----|--------|
|                     | 2 | Calcarine cortex ( <i>right</i> ), cuneus ( <i>bilateral</i> ), lingual gyrus ( <i>right</i> ), occipital superior ( <i>bilateral</i> ), occipital middle ( <i>right</i> ), occipital inferior ( <i>right</i> ), fusiform gyrus ( <i>right</i> ), parietal superior ( <i>bilateral</i> ), parietal inferior ( <i>right</i> ), angular gyrus ( <i>right</i> ), precuneus ( <i>bilateral</i> ), temporal superior ( <i>right</i> ), temporal middle ( <i>right</i> ), temporal inferior ( <i>right</i> )                                                                                                                                                                                                                                                                                                                           | 7, 17, 18, 19, 22, 23, 37, 39, 40                                                                                                                     | 34  | -68 | 22  | -5.935 |
|                     | 3 | Precentral gyrus ( <i>left</i> ), postcentral gyrus ( <i>left</i> ), parietal superior ( <i>left</i> ), precuneus ( <i>left</i> ), paracentral lobule ( <i>left</i> )                                                                                                                                                                                                                                                                                                                                                                                                                                                                                                                                                                                                                                                            | 1, 2, 3, 4, 5, 6, 7                                                                                                                                   | -22 | -40 | 74  | 5.122  |
|                     | 4 | Temporal middle ( <i>right</i> ), temporal inferior ( <i>right</i> )                                                                                                                                                                                                                                                                                                                                                                                                                                                                                                                                                                                                                                                                                                                                                             | 20, 21                                                                                                                                                | 66  | -36 | -10 | -4.963 |
|                     | 5 | Supramarginal gyrus ( <i>left</i> ), temporal superior ( <i>left</i> ), temporal middle ( <i>left</i> )                                                                                                                                                                                                                                                                                                                                                                                                                                                                                                                                                                                                                                                                                                                          | 21, 22, 41                                                                                                                                            | -58 | -48 | 14  | -4.692 |
|                     | 6 | Temporal middle ( <i>left</i> ), temporal inferior ( <i>left</i> )                                                                                                                                                                                                                                                                                                                                                                                                                                                                                                                                                                                                                                                                                                                                                               | 20, 21                                                                                                                                                | -58 | -40 | -14 | -4.431 |
|                     | 7 | Cuneus ( <i>left</i> ), occipital superior ( <i>left</i> ), occipital middle ( <i>left</i> ), temporal middle ( <i>left</i> )                                                                                                                                                                                                                                                                                                                                                                                                                                                                                                                                                                                                                                                                                                    | 18, 19, 37, 39                                                                                                                                        | -26 | -80 | 34  | -4.377 |
| AIC ( <i>left</i> ) | 1 | Precentral gyrus ( <i>bilateral</i> ), frontal superior ( <i>bilateral</i> ), frontal middle ( <i>bilateral</i> ), frontal inferior operculum ( <i>bilateral</i> ), frontal inferior triangularis ( <i>bilateral</i> ), frontal inferior orbital ( <i>bilateral</i> ), rolandic operculum ( <i>bilateral</i> ), supplementary motor area ( <i>bilateral</i> ), olfactory cortex ( <i>bilateral</i> ), frontal superior medial ( <i>bilateral</i> ), frontal medial orbital ( <i>bilateral</i> ), gyrus rectus ( <i>bilateral</i> ), medial OFC ( <i>bilateral</i> ), anterior OFC ( <i>left</i> ), posterior OFC ( <i>bilateral</i> ), lateral OFC ( <i>left</i> ), insula ( <i>bilateral</i> ), ACC ( <i>bilateral</i> ), MCC ( <i>bilateral</i> ), PCC ( <i>bilateral</i> ), hippocampus ( <i>bilateral</i> ), parahippocampal | 1, 2, 3, 4, 5, 6, 7, 8, 9, 10, 11, 17, 18, 19, 20, 21, 22, 23, 24, 25, 26, 28, 29, 30, 32, 34, 35, 36, 37, 38, 39, 40, 41, 42, 43, 44, 45, 46, 47, 48 | -42 | 0   | -10 | 26.570 |



---

|   |                                                                                                                                                                                                                                                                                                                                                                                                                                                                                                                                                                                                                                                                                                                                                                                                                                                                                               |                                       |     |     |    |         |  |
|---|-----------------------------------------------------------------------------------------------------------------------------------------------------------------------------------------------------------------------------------------------------------------------------------------------------------------------------------------------------------------------------------------------------------------------------------------------------------------------------------------------------------------------------------------------------------------------------------------------------------------------------------------------------------------------------------------------------------------------------------------------------------------------------------------------------------------------------------------------------------------------------------------------|---------------------------------------|-----|-----|----|---------|--|
|   | gyrus ( <i>bilateral</i> ), amygdala ( <i>bilateral</i> ), calcarine cortex ( <i>bilateral</i> ), cuneus ( <i>bilateral</i> ), lingual gyrus ( <i>right</i> ), occipital superior ( <i>right</i> ), occipital middle ( <i>right</i> ), postcentral gyrus ( <i>bilateral</i> ), parietal superior ( <i>bilateral</i> ), parietal inferior ( <i>bilateral</i> ), supramarginal gyrus ( <i>bilateral</i> ), angular gyrus ( <i>right</i> ), precuneus ( <i>bilateral</i> ), paracentral lobule ( <i>bilateral</i> ), caudate ( <i>bilateral</i> ), putamen ( <i>bilateral</i> ), pallidum ( <i>bilateral</i> ), thalamus ( <i>bilateral</i> ), Heschl's gyrus ( <i>bilateral</i> ), temporal superior ( <i>bilateral</i> ), temporal pole superior ( <i>bilateral</i> ), temporal middle ( <i>bilateral</i> ), temporal pole middle ( <i>bilateral</i> ), temporal inferior ( <i>bilateral</i> ) |                                       |     |     |    |         |  |
| 2 | Frontal superior ( <i>right</i> ), frontal middle ( <i>right</i> ), frontal inferior operculum ( <i>right</i> ), frontal inferior triangularis ( <i>right</i> ), frontal superior medial ( <i>right</i> )                                                                                                                                                                                                                                                                                                                                                                                                                                                                                                                                                                                                                                                                                     | 6, 8, 9, 32, 44, 45, 46, 48           | 34  | 20  | 58 | -11.316 |  |
| 3 | Frontal superior ( <i>left</i> ), frontal middle ( <i>left</i> ), frontal inferior triangularis ( <i>left</i> )                                                                                                                                                                                                                                                                                                                                                                                                                                                                                                                                                                                                                                                                                                                                                                               | 9, 32, 45, 46                         | -34 | 44  | 30 | 9.403   |  |
| 4 | Occipital superior ( <i>right</i> ), occipital middle ( <i>right</i> ), occipital inferior ( <i>right</i> ), fusiform gyrus ( <i>right</i> ), parietal superior ( <i>right</i> ), parietal inferior ( <i>right</i> ), angular gyrus ( <i>right</i> ), temporal superior ( <i>right</i> ), temporal middle ( <i>right</i> )                                                                                                                                                                                                                                                                                                                                                                                                                                                                                                                                                                    | 7, 18, 19, 21, 22, 37, 39, 40, 41, 48 | 50  | -64 | 26 | -8.443  |  |
| 5 | Frontal superior ( <i>bilateral</i> ), frontal middle ( <i>right</i> ), frontal superior medial ( <i>bilateral</i> ), frontal medial orbital ( <i>bilateral</i> ), gyrus rectus ( <i>bilateral</i> ), medial OFC ( <i>right</i> ), anterior OFC ( <i>bilateral</i> )                                                                                                                                                                                                                                                                                                                                                                                                                                                                                                                                                                                                                          | 10, 11, 46, 47                        | 18  | 68  | 10 | -8.078  |  |
| 6 | Frontal superior ( <i>right</i> ), frontal middle ( <i>right</i> )                                                                                                                                                                                                                                                                                                                                                                                                                                                                                                                                                                                                                                                                                                                                                                                                                            | 9, 46                                 | 34  | 48  | 34 | 7.958   |  |
| 7 | Frontal superior ( <i>left</i> ), frontal middle ( <i>left</i> ), frontal inferior operculum ( <i>left</i> ),                                                                                                                                                                                                                                                                                                                                                                                                                                                                                                                                                                                                                                                                                                                                                                                 | 8, 9, 32, 44, 45,                     | -38 | 16  | 54 | -7.604  |  |

---

|    |                                                                                                                                                                                                                                                                                                                                                                                                                                                                                                                                                                                                                                                                                                                                                                                                                                                                                                                                                                                                                                                                                                                                                                                                                                                                                                                                                         |                                                                                                                                                                                |     |     |     |        |
|----|---------------------------------------------------------------------------------------------------------------------------------------------------------------------------------------------------------------------------------------------------------------------------------------------------------------------------------------------------------------------------------------------------------------------------------------------------------------------------------------------------------------------------------------------------------------------------------------------------------------------------------------------------------------------------------------------------------------------------------------------------------------------------------------------------------------------------------------------------------------------------------------------------------------------------------------------------------------------------------------------------------------------------------------------------------------------------------------------------------------------------------------------------------------------------------------------------------------------------------------------------------------------------------------------------------------------------------------------------------|--------------------------------------------------------------------------------------------------------------------------------------------------------------------------------|-----|-----|-----|--------|
|    | frontal inferior triangularis ( <i>left</i> ), frontal superior medial ( <i>left</i> )                                                                                                                                                                                                                                                                                                                                                                                                                                                                                                                                                                                                                                                                                                                                                                                                                                                                                                                                                                                                                                                                                                                                                                                                                                                                  | 46, 48                                                                                                                                                                         |     |     |     |        |
| 8  | Temporal middle ( <i>left</i> ), temporal inferior ( <i>left</i> )                                                                                                                                                                                                                                                                                                                                                                                                                                                                                                                                                                                                                                                                                                                                                                                                                                                                                                                                                                                                                                                                                                                                                                                                                                                                                      | 20, 21, 37                                                                                                                                                                     | -62 | -28 | -18 | -7.145 |
| 9  | PCC ( <i>bilateral</i> ), calcarine cortex ( <i>left</i> ), lingual gyrus ( <i>bilateral</i> ), precuneus ( <i>bilateral</i> ), thalamus ( <i>right</i> ), vermis III, vermis IV/V                                                                                                                                                                                                                                                                                                                                                                                                                                                                                                                                                                                                                                                                                                                                                                                                                                                                                                                                                                                                                                                                                                                                                                      | 17, 18, 23, 26, 27,<br>29, 30                                                                                                                                                  | 2   | -44 | 6   | -6.941 |
| 10 | Occipital superior ( <i>left</i> ), occipital middle ( <i>left</i> ), parietal superior ( <i>left</i> ), parietal inferior ( <i>left</i> ), angular gyrus ( <i>left</i> ), precuneus ( <i>left</i> ), temporal middle ( <i>left</i> )                                                                                                                                                                                                                                                                                                                                                                                                                                                                                                                                                                                                                                                                                                                                                                                                                                                                                                                                                                                                                                                                                                                   | 7, 17, 18, 19, 39                                                                                                                                                              | -34 | -88 | 18  | -6.596 |
| 1  | Precentral gyrus ( <i>bilateral</i> ), frontal superior ( <i>bilateral</i> ), frontal middle ( <i>bilateral</i> ), frontal inferior operculum ( <i>bilateral</i> ), frontal inferior triangularis ( <i>bilateral</i> ), frontal inferior orbital ( <i>bilateral</i> ), rolandic operculum ( <i>bilateral</i> ), supplementary motor area ( <i>bilateral</i> ), olfactory cortex ( <i>bilateral</i> ), frontal superior medial ( <i>bilateral</i> ), gyrus rectus ( <i>bilateral</i> ), medial OFC ( <i>bilateral</i> ), anterior OFC ( <i>right</i> ), posterior OFC ( <i>bilateral</i> ), insula ( <i>bilateral</i> ), ACC ( <i>left</i> ), MCC ( <i>bilateral</i> ), PCC ( <i>bilateral</i> ), hippocampus ( <i>bilateral</i> ), parahippocampal gyrus ( <i>bilateral</i> ), amygdala ( <i>bilateral</i> ), calcarine cortex ( <i>bilateral</i> ), cuneus ( <i>bilateral</i> ), lingual gyrus ( <i>bilateral</i> ), occipital superior ( <i>bilateral</i> ), occipital middle ( <i>bilateral</i> ), fusiform gyrus ( <i>bilateral</i> ), postcentral gyrus ( <i>bilateral</i> ), parietal superior ( <i>bilateral</i> ), parietal inferior ( <i>bilateral</i> ), supramarginal gyrus ( <i>bilateral</i> ), angular gyrus ( <i>bilateral</i> ), precuneus ( <i>bilateral</i> ), paracentral lobule ( <i>bilateral</i> ), caudate ( <i>bilateral</i> ), | 1, 2, 3, 4, 5, 6, 7,<br>8, 9, 10, 11, 17,<br>18, 19, 20, 21, 22,<br>23, 24, 25, 26, 27,<br>28, 29, 30, 32, 34,<br>35, 36, 37, 38, 39,<br>40, 41, 42, 43, 44,<br>45, 46, 47, 48 | 54  | 12  | 6   | 24.530 |

AIC (*right*)

---

|    |                                                                                                                                                                                                                                                                                                                                                                                                                                                                                                        |                                       |     |     |     |        |
|----|--------------------------------------------------------------------------------------------------------------------------------------------------------------------------------------------------------------------------------------------------------------------------------------------------------------------------------------------------------------------------------------------------------------------------------------------------------------------------------------------------------|---------------------------------------|-----|-----|-----|--------|
|    | putamen ( <i>bilateral</i> ), pallidum ( <i>bilateral</i> ), thalamus ( <i>bilateral</i> ), Heschl's<br>gyrus ( <i>bilateral</i> ), temporal superior ( <i>bilateral</i> ), temporal pole superior<br>( <i>bilateral</i> ), temporal middle ( <i>bilateral</i> ), temporal pole middle ( <i>bilateral</i> ),<br>temporal inferior ( <i>bilateral</i> ), cerebellum III ( <i>right</i> ), cerebellum IV/V<br>( <i>bilateral</i> ), cerebellum VI ( <i>right</i> ), vermis I/II, vermis III, vermis IV/V |                                       |     |     |     |        |
| 2  | Precentral gyrus ( <i>left</i> ), postcentral gyrus ( <i>left</i> )                                                                                                                                                                                                                                                                                                                                                                                                                                    | 3, 4, 6, 48                           | -38 | -16 | 42  | 7.671  |
| 3  | Frontal superior ( <i>bilateral</i> ), frontal middle ( <i>left</i> ), frontal superior medial<br>( <i>bilateral</i> ), frontal medial orbital ( <i>bilateral</i> ), gyrus rectus ( <i>bilateral</i> ), medial<br>OFC ( <i>bilateral</i> ), anterior OFC ( <i>bilateral</i> )                                                                                                                                                                                                                          | 10, 11, 46, 47                        | 2   | 60  | -10 | -7.536 |
| 4  | Temporal middle ( <i>right</i> ), temporal inferior ( <i>right</i> )                                                                                                                                                                                                                                                                                                                                                                                                                                   | 20, 21                                | 62  | -4  | -18 | -7.112 |
| 5  | Frontal superior ( <i>left</i> ), frontal middle ( <i>left</i> )                                                                                                                                                                                                                                                                                                                                                                                                                                       | 9, 46                                 | -34 | 44  | 30  | 6.818  |
| 6  | - <sup>3</sup>                                                                                                                                                                                                                                                                                                                                                                                                                                                                                         | 48                                    | -30 | 20  | 26  | -6.301 |
| 7  | Occipital middle ( <i>right</i> ), occipital inferior ( <i>right</i> ), fusiform gyrus ( <i>right</i> ),<br>temporal middle ( <i>right</i> ), temporal inferior ( <i>right</i> ), cerebellum crus I ( <i>right</i> ) <sup>1</sup>                                                                                                                                                                                                                                                                      | 19, 20, 37                            | 50  | -60 | -18 | -6.095 |
| 8  | Postcentral gyrus ( <i>left</i> ), parietal superior ( <i>left</i> ), precuneus ( <i>left</i> ), paracentral<br>lobule ( <i>left</i> )                                                                                                                                                                                                                                                                                                                                                                 | 1, 2, 3, 4, 5, 7                      | -22 | -48 | 74  | 5.483  |
| 9  | PCC ( <i>right</i> ), calcarine cortex ( <i>right</i> ), lingual gyrus ( <i>right</i> ), occipital middle<br>( <i>right</i> ), parietal inferior ( <i>right</i> ), angular gyrus ( <i>right</i> ), precuneus ( <i>right</i> ),<br>temporal superior ( <i>right</i> ), temporal middle ( <i>right</i> ), vermis IV/V <sup>1</sup>                                                                                                                                                                       | 17, 21, 22, 27, 29,<br>30, 37, 39, 40 | 50  | -68 | 26  | -9.978 |
| 10 | Cuneus ( <i>right</i> ), occipital superior ( <i>right</i> )                                                                                                                                                                                                                                                                                                                                                                                                                                           | 18, 19                                | 14  | -84 | 26  | 4.792  |

---

- 
1. Although automated anatomical labeling indicated that the cerebellum was part of this cluster, visual inspection suggested otherwise; i.e., some voxels were located in the cerebellum according to the AAL atlas, but seemed not to be part of this anatomical region when superimposed on the standard MNI brain.
  2. Although the Brodmann atlas indicated that these Brodmann areas were part of the cluster, visual inspection suggested otherwise; i.e., some voxels were located at the edge of the region defined by the Brodmann atlas, however the edges of these Brodmann seemed to extend beyond the border of the actual anatomical region when superimposed on the standard MNI brain.
  3. Visual inspection suggested that this cluster was located in the white matter. Hence, the cluster did not yield any brain area when subjected to automated anatomical labeling.

**Supplementary Table 2.**

*Within-group results yielded by the permutation-based cluster analyses for the impulsive aggression group.*

| Seed-region         | Cluster | Anatomical location                                                                                                                                                                                                                                                                                                                                                                                                                                                                                                                                                                                                                                                                                                                                                                                                                                                                                                                                                                                                                                                                                                                                                                                                                                                                                                                                                                                                                                                                                                                                                                                                | Brodmann areas                                                                                                                                  | Center of gravity |    |     | Peak    |
|---------------------|---------|--------------------------------------------------------------------------------------------------------------------------------------------------------------------------------------------------------------------------------------------------------------------------------------------------------------------------------------------------------------------------------------------------------------------------------------------------------------------------------------------------------------------------------------------------------------------------------------------------------------------------------------------------------------------------------------------------------------------------------------------------------------------------------------------------------------------------------------------------------------------------------------------------------------------------------------------------------------------------------------------------------------------------------------------------------------------------------------------------------------------------------------------------------------------------------------------------------------------------------------------------------------------------------------------------------------------------------------------------------------------------------------------------------------------------------------------------------------------------------------------------------------------------------------------------------------------------------------------------------------------|-------------------------------------------------------------------------------------------------------------------------------------------------|-------------------|----|-----|---------|
|                     |         |                                                                                                                                                                                                                                                                                                                                                                                                                                                                                                                                                                                                                                                                                                                                                                                                                                                                                                                                                                                                                                                                                                                                                                                                                                                                                                                                                                                                                                                                                                                                                                                                                    |                                                                                                                                                 | x                 | y  | z   | z-score |
|                     | 1       | Precentral gyrus ( <i>right</i> ), frontal superior ( <i>bilateral</i> ), frontal middle ( <i>left</i> ),<br>frontal inferior triangularis ( <i>left</i> ), frontal inferior orbital ( <i>left</i> ), rolandic<br>operculum ( <i>bilateral</i> ), supplementary motor area ( <i>bilateral</i> ), olfactory cortex<br>( <i>bilateral</i> ), frontal superior medial ( <i>bilateral</i> ), frontal medial orbital<br>( <i>bilateral</i> ), gyrus rectus ( <i>bilateral</i> ), medial OFC ( <i>left</i> ), anterior OFC ( <i>left</i> ),<br>posterior OFC ( <i>bilateral</i> ), lateral OFC ( <i>left</i> ), insula ( <i>bilateral</i> ), ACC<br>( <i>bilateral</i> ), MCC ( <i>bilateral</i> ), PCC ( <i>bilateral</i> ), hippocampus ( <i>bilateral</i> ),<br>parahippocampal gyrus ( <i>bilateral</i> ), amygdala ( <i>bilateral</i> ), calcarine cortex<br>( <i>bilateral</i> ), cuneus ( <i>left</i> ), lingual gyrus ( <i>bilateral</i> ), occipital middle ( <i>left</i> ),<br>fusiform gyrus ( <i>bilateral</i> ), postcentral gyrus ( <i>left</i> ), parietal inferior ( <i>left</i> ),<br>supramarginal gyrus ( <i>left</i> ), angular gyrus ( <i>left</i> ), precuneus ( <i>bilateral</i> ),<br>paracentral lobule ( <i>bilateral</i> ), caudate ( <i>bilateral</i> ), putamen ( <i>bilateral</i> ),<br>thalamus ( <i>bilateral</i> ), Heschl's gyrus ( <i>bilateral</i> ), temporal superior<br>( <i>bilateral</i> ), temporal pole superior ( <i>bilateral</i> ), temporal middle ( <i>bilateral</i> ),<br>temporal pole middle ( <i>bilateral</i> ), temporal inferior ( <i>bilateral</i> ), cerebellum | 4, 6, 7, 8, 9, 10,<br>11, 17, 18, 19, 20,<br>21, 22, 23, 24, 25,<br>26, 27, 28, 29, 30,<br>32, 34, 35, 36, 37,<br>38, 39, 41, 42, 45,<br>47, 48 | -22               | -8 | -18 | 23.957  |
| BLA ( <i>left</i> ) |         |                                                                                                                                                                                                                                                                                                                                                                                                                                                                                                                                                                                                                                                                                                                                                                                                                                                                                                                                                                                                                                                                                                                                                                                                                                                                                                                                                                                                                                                                                                                                                                                                                    |                                                                                                                                                 |                   |    |     |         |

|    |                                                                                                                                                                                                                                                                                                                                                                                                                                                                                                                                                  |                                                                                                                 |     |     |     |        |
|----|--------------------------------------------------------------------------------------------------------------------------------------------------------------------------------------------------------------------------------------------------------------------------------------------------------------------------------------------------------------------------------------------------------------------------------------------------------------------------------------------------------------------------------------------------|-----------------------------------------------------------------------------------------------------------------|-----|-----|-----|--------|
|    | IV/V ( <i>left</i> ) <sup>1</sup> , vermis IV/V <sup>1</sup>                                                                                                                                                                                                                                                                                                                                                                                                                                                                                     |                                                                                                                 |     |     |     |        |
| 2  | Postcentral gyrus ( <i>right</i> ), parietal superior ( <i>right</i> ), parietal inferior ( <i>right</i> ),<br>supramarginal gyrus ( <i>right</i> ), angular gyrus ( <i>right</i> )                                                                                                                                                                                                                                                                                                                                                              | 2, 39, 40, 48                                                                                                   | 54  | -36 | 46  | -8.483 |
| 3  | Precentral gyrus ( <i>left</i> ), postcentral gyrus ( <i>left</i> ), paracentral lobule ( <i>left</i> )                                                                                                                                                                                                                                                                                                                                                                                                                                          | 3, 4, 6, 43, 48                                                                                                 | -38 | -20 | 66  | 8.404  |
| 4  | Frontal superior ( <i>right</i> ), frontal middle ( <i>right</i> ), frontal inferior triangularis<br>( <i>right</i> ), insula ( <i>right</i> )                                                                                                                                                                                                                                                                                                                                                                                                   | 9, 10, 44, 45, 46,<br>47, 48                                                                                    | 38  | 40  | 34  | -7.994 |
| 5  | Cuneus ( <i>bilateral</i> ), occipital superior ( <i>bilateral</i> ), parietal superior ( <i>bilateral</i> ),<br>angular gyrus ( <i>right</i> ), precuneus ( <i>bilateral</i> )                                                                                                                                                                                                                                                                                                                                                                  | 5, 7, 18, 19                                                                                                    | 10  | -76 | 46  | -7.421 |
| 6  | Postcentral gyrus ( <i>right</i> ), frontal middle ( <i>right</i> ), postcentral gyrus ( <i>right</i> )                                                                                                                                                                                                                                                                                                                                                                                                                                          | 3, 4, 6                                                                                                         | 42  | -16 | 58  | 5.880  |
| 7  | Parietal inferior ( <i>left</i> ), supramarginal gyrus ( <i>left</i> ), angular gyrus ( <i>left</i> )                                                                                                                                                                                                                                                                                                                                                                                                                                            | 2, 7, 39, 40, 48                                                                                                | -46 | -44 | 34  | -5.378 |
| 8  | Rolandic operculum ( <i>right</i> ), insula ( <i>right</i> ), Heschl's gyrus ( <i>right</i> )                                                                                                                                                                                                                                                                                                                                                                                                                                                    | 48                                                                                                              | 38  | -16 | 14  | 4.846  |
| 9  | Calcarine cortex ( <i>bilateral</i> ), lingual gyrus ( <i>bilateral</i> ), cerebellum VI ( <i>right</i> ) <sup>1</sup> ,<br>vermis VI <sup>1</sup>                                                                                                                                                                                                                                                                                                                                                                                               | 17, 18, 19                                                                                                      | 14  | -72 | 2   | -4.580 |
| 10 | Frontal superior ( <i>right</i> ), supplementary motor area ( <i>right</i> )                                                                                                                                                                                                                                                                                                                                                                                                                                                                     | 6, 8                                                                                                            | 18  | 8   | 58  | -4.544 |
| 11 | Frontal superior ( <i>left</i> ), frontal middle ( <i>left</i> )                                                                                                                                                                                                                                                                                                                                                                                                                                                                                 | 8, 9, 32                                                                                                        | -18 | 36  | 46  | 5.002  |
| 1  | Precentral gyrus ( <i>right</i> ), frontal superior ( <i>bilateral</i> ), frontal middle ( <i>right</i> ),<br>frontal inferior operculum ( <i>right</i> ), frontal inferior orbital ( <i>right</i> ), rolandic<br>operculum ( <i>right</i> ), olfactory cortex ( <i>bilateral</i> ), frontal superior medial<br>( <i>bilateral</i> ), frontal medial orbital ( <i>bilateral</i> ), gyrus rectus ( <i>bilateral</i> ), medial<br>OFC ( <i>right</i> ), posterior OFC ( <i>bilateral</i> ), insula ( <i>bilateral</i> ), ACC ( <i>bilateral</i> ), | 3, 4, 6, 9, 10, 11,<br>17, 20, 21, 22, 23,<br>25, 27, 28, 29, 30,<br>32, 34, 35, 36, 37,<br>38, 41, 42, 43, 47, | 22  | -4  | -14 | 20.478 |

BLA *right*)

---

|   |                                                                                                                                                                                                                                                                                                                                                                                                                                                                                                                                                                                                                                                                                                                                  |                    |     |     |    |        |  |
|---|----------------------------------------------------------------------------------------------------------------------------------------------------------------------------------------------------------------------------------------------------------------------------------------------------------------------------------------------------------------------------------------------------------------------------------------------------------------------------------------------------------------------------------------------------------------------------------------------------------------------------------------------------------------------------------------------------------------------------------|--------------------|-----|-----|----|--------|--|
|   | PCC ( <i>bilateral</i> ), hippocampus ( <i>bilateral</i> ), parahippocampal gyrus ( <i>bilateral</i> ), amygdala ( <i>bilateral</i> ), calcarine cortex ( <i>bilateral</i> ), lingual gyrus ( <i>bilateral</i> ), fusiform gyrus ( <i>bilateral</i> ), postcentral gyrus ( <i>right</i> ), supramarginal gyrus ( <i>right</i> ), precuneus ( <i>bilateral</i> ), caudate ( <i>bilateral</i> ), putamen ( <i>bilateral</i> ), pallidum ( <i>right</i> ), thalamus ( <i>right</i> ), Heschl's gyrus ( <i>right</i> ), temporal superior ( <i>bilateral</i> ), temporal pole superior ( <i>bilateral</i> ), temporal middle ( <i>bilateral</i> ), temporal pole middle ( <i>bilateral</i> ), temporal inferior ( <i>bilateral</i> ) | 48                 |     |     |    |        |  |
| 2 | Rolandic operculum ( <i>left</i> ), insula ( <i>left</i> ), Heschl's gyrus ( <i>left</i> ), temporal superior ( <i>left</i> ), temporal middle ( <i>left</i> )                                                                                                                                                                                                                                                                                                                                                                                                                                                                                                                                                                   | 21, 22, 41, 42, 48 | -50 | -32 | 2  | 6.155  |  |
| 3 | Cuneus ( <i>bilateral</i> ), occipital superior ( <i>left</i> ), parietal superior ( <i>bilateral</i> ), precuneus ( <i>bilateral</i> )                                                                                                                                                                                                                                                                                                                                                                                                                                                                                                                                                                                          | 7, 18, 19          | -6  | -72 | 38 | -5.763 |  |
| 4 | Parietal inferior ( <i>left</i> ), supramarginal gyrus ( <i>left</i> )                                                                                                                                                                                                                                                                                                                                                                                                                                                                                                                                                                                                                                                           | 2, 7, 39, 40, 48   | -34 | -52 | 42 | -5.668 |  |
| 5 | Supplementary motor area ( <i>bilateral</i> ), ACC ( <i>left</i> ), MCC ( <i>bilateral</i> ), postcentral gyrus ( <i>right</i> ), precuneus ( <i>left</i> ), paracentral lobule ( <i>bilateral</i> )                                                                                                                                                                                                                                                                                                                                                                                                                                                                                                                             | 4, 5, 6, 23, 24    | 2   | -20 | 62 | 5.391  |  |
| 6 | Parietal superior ( <i>right</i> ), parietal inferior ( <i>right</i> ), supramarginal gyrus ( <i>right</i> ), angular gyrus ( <i>right</i> )                                                                                                                                                                                                                                                                                                                                                                                                                                                                                                                                                                                     | 39, 40, 48         | 46  | -48 | 54 | -5.016 |  |
| 7 | Precentral gyrus ( <i>left</i> ), postcentral gyrus ( <i>left</i> ), paracentral lobule ( <i>left</i> )                                                                                                                                                                                                                                                                                                                                                                                                                                                                                                                                                                                                                          | 3, 4, 6            | -54 | -12 | 46 | 4.875  |  |
| 8 | Occipital middle ( <i>left</i> )                                                                                                                                                                                                                                                                                                                                                                                                                                                                                                                                                                                                                                                                                                 | 19, 37, 39         | -34 | -76 | 22 | -4.428 |  |
| 9 | Calcarine cortex ( <i>bilateral</i> ), cuneus ( <i>right</i> ), lingual gyrus ( <i>bilateral</i> )                                                                                                                                                                                                                                                                                                                                                                                                                                                                                                                                                                                                                               | 17, 18             | 6   | -84 | 6  | -4.083 |  |

---

|                      |   |                                                                                                                                                                                                                                                                                                                                                                                                                                                                                                                                                                                                                                                                                                                                                         |                                                           |     |     |     |        |
|----------------------|---|---------------------------------------------------------------------------------------------------------------------------------------------------------------------------------------------------------------------------------------------------------------------------------------------------------------------------------------------------------------------------------------------------------------------------------------------------------------------------------------------------------------------------------------------------------------------------------------------------------------------------------------------------------------------------------------------------------------------------------------------------------|-----------------------------------------------------------|-----|-----|-----|--------|
| CeM ( <i>left</i> )  | 1 | Frontal inferior operculum ( <i>left</i> ), frontal inferior triangularis ( <i>left</i> ), rolandic operculum ( <i>left</i> ), olfactory cortex ( <i>left</i> ), gyrus rectus ( <i>left</i> ), insula ( <i>bilateral</i> ), hippocampus ( <i>bilateral</i> ), parahippocampal gyrus ( <i>bilateral</i> ), amygdala ( <i>bilateral</i> ), lingual gyrus ( <i>left</i> ), fusiform gyrus ( <i>left</i> ), caudate ( <i>bilateral</i> ), putamen ( <i>bilateral</i> ), pallidum ( <i>bilateral</i> ), thalamus ( <i>bilateral</i> ), Heschl's gyrus ( <i>left</i> ), temporal superior ( <i>left</i> ), temporal pole superior ( <i>left</i> ), cerebellum III ( <i>left</i> ), cerebellum IV/V ( <i>left</i> ), cerebellum VI ( <i>left</i> ), vermis III | 6, 11, 19, 20, 25, 27, 28, 30, 34, 35, 37, 41, 45, 47, 48 | -22 | -12 | -6  | 30.343 |
|                      | 2 | Angular gyrus ( <i>right</i> ), precuneus ( <i>right</i> )                                                                                                                                                                                                                                                                                                                                                                                                                                                                                                                                                                                                                                                                                              | 17, 39, 41, 48                                            | 38  | -48 | 26  | -5.301 |
|                      | 3 | Precentral gyrus ( <i>right</i> ), postcentral gyrus ( <i>right</i> ), parietal inferior ( <i>right</i> )                                                                                                                                                                                                                                                                                                                                                                                                                                                                                                                                                                                                                                               | 2, 3, 4, 6                                                | 26  | -8  | 34  | -5.026 |
|                      | 4 | Postcentral gyrus ( <i>left</i> ), supramarginal gyrus ( <i>left</i> ), temporal superior ( <i>left</i> )                                                                                                                                                                                                                                                                                                                                                                                                                                                                                                                                                                                                                                               | 39, 41, 42, 48                                            | -58 | -20 | 22  | 4.158  |
| CeM ( <i>right</i> ) | 1 | Frontal middle ( <i>right</i> ), frontal inferior operculum ( <i>right</i> ), frontal inferior triangularis ( <i>right</i> ), frontal inferior orbital ( <i>right</i> ), olfactory cortex ( <i>right</i> ), gyrus rectus ( <i>right</i> ), insula ( <i>bilateral</i> ), PCC ( <i>right</i> ), hippocampus ( <i>bilateral</i> ), amygdala ( <i>bilateral</i> ), caudate ( <i>bilateral</i> ), putamen ( <i>bilateral</i> ), pallidum ( <i>bilateral</i> ), thalamus ( <i>bilateral</i> ), Heschl's gyrus ( <i>bilateral</i> ), temporal superior ( <i>right</i> ), cerebellum III ( <i>left</i> ), cerebellum IV/V ( <i>left</i> ), vermis III, vermis IV/V                                                                                              | 11, 18, 20, 22, 25, 27, 30, 34, 35, 37, 45, 47, 48        | 26  | -8  | -10 | 19.866 |
|                      | 2 | Supplementary motor area ( <i>bilateral</i> ), frontal superior medial ( <i>bilateral</i> ), MCC ( <i>bilateral</i> )                                                                                                                                                                                                                                                                                                                                                                                                                                                                                                                                                                                                                                   | 6, 24, 32                                                 | 6   | 12  | 46  | 5.545  |
|                      | 3 | Frontal middle ( <i>right</i> ), frontal inferior operculum ( <i>right</i> ), frontal inferior                                                                                                                                                                                                                                                                                                                                                                                                                                                                                                                                                                                                                                                          | 44, 45, 48                                                | 50  | 24  | 30  | 5.454  |



|   |                                                                                                                                                                                                                                                                                                                                                                                                                                                                                                                                                                                                                                                                                                                                                                                                                                                                                                                                                                                                                                                                                                                                                                                                                                                 |                                                                                                                   |     |     |     |        |  |
|---|-------------------------------------------------------------------------------------------------------------------------------------------------------------------------------------------------------------------------------------------------------------------------------------------------------------------------------------------------------------------------------------------------------------------------------------------------------------------------------------------------------------------------------------------------------------------------------------------------------------------------------------------------------------------------------------------------------------------------------------------------------------------------------------------------------------------------------------------------------------------------------------------------------------------------------------------------------------------------------------------------------------------------------------------------------------------------------------------------------------------------------------------------------------------------------------------------------------------------------------------------|-------------------------------------------------------------------------------------------------------------------|-----|-----|-----|--------|--|
|   | triangularis ( <i>right</i> )                                                                                                                                                                                                                                                                                                                                                                                                                                                                                                                                                                                                                                                                                                                                                                                                                                                                                                                                                                                                                                                                                                                                                                                                                   |                                                                                                                   |     |     |     |        |  |
| 4 | Hippocampus ( <i>left</i> ), fusiform gyrus ( <i>left</i> ), temporal superior ( <i>left</i> ), temporal middle ( <i>left</i> ), temporal inferior ( <i>left</i> )                                                                                                                                                                                                                                                                                                                                                                                                                                                                                                                                                                                                                                                                                                                                                                                                                                                                                                                                                                                                                                                                              | 20, 21, 22, 48                                                                                                    | -54 | -16 | -10 | -5.211 |  |
| 5 | ACC ( <i>left</i> )                                                                                                                                                                                                                                                                                                                                                                                                                                                                                                                                                                                                                                                                                                                                                                                                                                                                                                                                                                                                                                                                                                                                                                                                                             | 11, 25, 48                                                                                                        | 2   | 28  | 10  | -4.791 |  |
| 6 | Fusiform gyrus ( <i>right</i> ) <sup>2</sup> , cerebellum IV/V ( <i>right</i> ), cerebellum VI ( <i>bilateral</i> ), vermis III, vermis IV/V, vermis VI                                                                                                                                                                                                                                                                                                                                                                                                                                                                                                                                                                                                                                                                                                                                                                                                                                                                                                                                                                                                                                                                                         | 18, 19, 30, 37 <sup>2</sup>                                                                                       | 6   | -56 | -22 | 4.361  |  |
| 1 | Precentral gyrus ( <i>left</i> ), frontal superior ( <i>bilateral</i> ), frontal middle ( <i>left</i> ), frontal inferior orbital ( <i>left</i> ), rolandic operculum ( <i>left</i> ), supplementary motor area ( <i>bilateral</i> ), olfactory cortex ( <i>bilateral</i> ), frontal superior medial ( <i>bilateral</i> ), frontal medial orbital ( <i>bilateral</i> ), gyrus rectus ( <i>bilateral</i> ), medial OFC ( <i>left</i> ), anterior OFC ( <i>left</i> ), insula ( <i>bilateral</i> ), ACC ( <i>bilateral</i> ), MCC ( <i>bilateral</i> ), hippocampus ( <i>bilateral</i> ), parahippocampal gyrus ( <i>bilateral</i> ), amygdala ( <i>bilateral</i> ), lingual gyrus ( <i>right</i> ), fusiform gyrus ( <i>left</i> ), postcentral gyrus ( <i>bilateral</i> ), parietal superior ( <i>bilateral</i> ), parietal inferior ( <i>left</i> ), supramarginal gyrus ( <i>left</i> ), precuneus ( <i>bilateral</i> ), paracentral lobule ( <i>bilateral</i> ), caudate ( <i>bilateral</i> ), putamen ( <i>bilateral</i> ), pallidum ( <i>bilateral</i> ), thalamus ( <i>bilateral</i> ), Heschl's gyrus ( <i>left</i> ), temporal superior ( <i>left</i> ), temporal middle ( <i>left</i> ), cerebellum IV/V ( <i>right</i> ) <sup>1</sup> | 1, 2, 3, 4, 5, 6, 7, 8, 9, 10, 11, 20, 21, 22, 23, 24, 25, 27, 28, 30, 32, 34, 35, 36, 40, 41, 42, 45, 46, 47, 48 | -2  | 8   | 2   | 14.312 |  |
|   | ACC ( <i>left</i> )                                                                                                                                                                                                                                                                                                                                                                                                                                                                                                                                                                                                                                                                                                                                                                                                                                                                                                                                                                                                                                                                                                                                                                                                                             |                                                                                                                   |     |     |     |        |  |
| 2 | Occipital middle ( <i>right</i> ), precuneus ( <i>right</i> )                                                                                                                                                                                                                                                                                                                                                                                                                                                                                                                                                                                                                                                                                                                                                                                                                                                                                                                                                                                                                                                                                                                                                                                   | 19, 39, 40, 48                                                                                                    | 26  | -48 | 30  | -7.128 |  |
| 3 | Precentral gyrus ( <i>left</i> ), frontal superior ( <i>left</i> ), frontal middle ( <i>left</i> ), frontal                                                                                                                                                                                                                                                                                                                                                                                                                                                                                                                                                                                                                                                                                                                                                                                                                                                                                                                                                                                                                                                                                                                                     | 3, 4, 6, 21, 22, 38,                                                                                              | -54 | 4   | 2   | 5.656  |  |

|                      |                                                                                                                                                                                                                                                                                                                                                                                                                                                                                                                                                                                                                                                                                                                                                                                                                                                                                                                                                                                                                                                                                                                          |                                                                                    |    |     |     |        |
|----------------------|--------------------------------------------------------------------------------------------------------------------------------------------------------------------------------------------------------------------------------------------------------------------------------------------------------------------------------------------------------------------------------------------------------------------------------------------------------------------------------------------------------------------------------------------------------------------------------------------------------------------------------------------------------------------------------------------------------------------------------------------------------------------------------------------------------------------------------------------------------------------------------------------------------------------------------------------------------------------------------------------------------------------------------------------------------------------------------------------------------------------------|------------------------------------------------------------------------------------|----|-----|-----|--------|
|                      | inferior operculum ( <i>left</i> ), frontal inferior orbital ( <i>left</i> ), rolandic operculum ( <i>left</i> ), postcentral gyrus ( <i>left</i> ), parietal inferior ( <i>left</i> ), temporal superior ( <i>left</i> ), temporal pole superior ( <i>left</i> ), temporal middle ( <i>left</i> )                                                                                                                                                                                                                                                                                                                                                                                                                                                                                                                                                                                                                                                                                                                                                                                                                       | 44, 48                                                                             |    |     |     |        |
| 4                    | Frontal inferior operculum ( <i>right</i> ), rolandic operculum ( <i>right</i> ), insula ( <i>right</i> ), postcentral gyrus ( <i>right</i> ), Heschl's gyrus ( <i>right</i> ), temporal superior ( <i>right</i> ), temporal pole superior ( <i>right</i> )                                                                                                                                                                                                                                                                                                                                                                                                                                                                                                                                                                                                                                                                                                                                                                                                                                                              | 6, 22, 38, 48                                                                      | 58 | 4   | 6   | 4.917  |
| 5                    | Temporal middle ( <i>right</i> ), temporal inferior ( <i>right</i> )                                                                                                                                                                                                                                                                                                                                                                                                                                                                                                                                                                                                                                                                                                                                                                                                                                                                                                                                                                                                                                                     | 20                                                                                 | 58 | -32 | -22 | -4.595 |
| 6                    | Precentral gyrus ( <i>right</i> ), frontal middle ( <i>right</i> ), postcentral gyrus ( <i>right</i> )                                                                                                                                                                                                                                                                                                                                                                                                                                                                                                                                                                                                                                                                                                                                                                                                                                                                                                                                                                                                                   | 3, 4, 6                                                                            | 38 | -12 | 42  | 4.594  |
| 1                    | Precentral gyrus ( <i>left</i> ), frontal superior ( <i>bilateral</i> ), frontal middle ( <i>right</i> ), frontal inferior operculum ( <i>right</i> ), frontal inferior triangularis ( <i>right</i> ), frontal inferior orbital ( <i>left</i> ), rolandic operculum ( <i>bilateral</i> ), supplementary motor area ( <i>bilateral</i> ), olfactory cortex ( <i>bilateral</i> ), frontal superior medial ( <i>bilateral</i> ), frontal medial orbital ( <i>bilateral</i> ), gyrus rectus ( <i>bilateral</i> ), anterior OFC ( <i>left</i> ), insula ( <i>bilateral</i> ), ACC ( <i>bilateral</i> ), MCC ( <i>bilateral</i> ), PCC ( <i>left</i> ), hippocampus ( <i>bilateral</i> ), parahippocampal area ( <i>bilateral</i> ), amygdala ( <i>bilateral</i> ), lingual gyrus ( <i>bilateral</i> ), precuneus ( <i>bilateral</i> ), paracentral lobule ( <i>bilateral</i> ), caudate ( <i>bilateral</i> ), putamen ( <i>bilateral</i> ), pallidum ( <i>bilateral</i> ), thalamus ( <i>bilateral</i> ), Heschl's gyrus ( <i>bilateral</i> ), temporal superior ( <i>left</i> ), temporal pole superior ( <i>bilateral</i> ) | 4, 5, 6, 9, 10, 11, 20, 22, 23, 24, 25, 27, 28, 30, 32, 34, 35, 36, 38, 46, 47, 48 | 2  | 4   | 2   | 14.278 |
| ACC ( <i>right</i> ) |                                                                                                                                                                                                                                                                                                                                                                                                                                                                                                                                                                                                                                                                                                                                                                                                                                                                                                                                                                                                                                                                                                                          |                                                                                    |    |     |     |        |
| 2                    | Occipital superior ( <i>right</i> ), occipital middle ( <i>right</i> ), parietal superior ( <i>right</i> ),                                                                                                                                                                                                                                                                                                                                                                                                                                                                                                                                                                                                                                                                                                                                                                                                                                                                                                                                                                                                              | 7, 19, 39, 40, 48                                                                  | 38 | -64 | 54  | -7.171 |

|                     |                                                                                                                                                                                                                                                                                                                                                                                                                                                                                                                                                                                                                                                                                                                                                                                                                                                                                                                                                                                                                                                                                                                                                                                                                                                                                                                                                                                                                                                                                          |                                                                                                                               |     |     |    |         |
|---------------------|------------------------------------------------------------------------------------------------------------------------------------------------------------------------------------------------------------------------------------------------------------------------------------------------------------------------------------------------------------------------------------------------------------------------------------------------------------------------------------------------------------------------------------------------------------------------------------------------------------------------------------------------------------------------------------------------------------------------------------------------------------------------------------------------------------------------------------------------------------------------------------------------------------------------------------------------------------------------------------------------------------------------------------------------------------------------------------------------------------------------------------------------------------------------------------------------------------------------------------------------------------------------------------------------------------------------------------------------------------------------------------------------------------------------------------------------------------------------------------------|-------------------------------------------------------------------------------------------------------------------------------|-----|-----|----|---------|
|                     | parietal inferior ( <i>right</i> ), angular gyrus ( <i>right</i> )                                                                                                                                                                                                                                                                                                                                                                                                                                                                                                                                                                                                                                                                                                                                                                                                                                                                                                                                                                                                                                                                                                                                                                                                                                                                                                                                                                                                                       |                                                                                                                               |     |     |    |         |
| 3                   | Parietal superior ( <i>left</i> ), parietal inferior ( <i>left</i> ), angular gyrus ( <i>left</i> )                                                                                                                                                                                                                                                                                                                                                                                                                                                                                                                                                                                                                                                                                                                                                                                                                                                                                                                                                                                                                                                                                                                                                                                                                                                                                                                                                                                      | 7, 39, 40                                                                                                                     | -30 | -60 | 62 | -5.530  |
| 4                   | Frontal superior ( <i>left</i> ), frontal middle ( <i>left</i> )                                                                                                                                                                                                                                                                                                                                                                                                                                                                                                                                                                                                                                                                                                                                                                                                                                                                                                                                                                                                                                                                                                                                                                                                                                                                                                                                                                                                                         | 9, 46, 48                                                                                                                     | -26 | 28  | 34 | 4.248   |
| 1                   | Precentral gyrus ( <i>bilateral</i> ), frontal superior ( <i>bilateral</i> ), frontal middle ( <i>bilateral</i> ), frontal inferior operculum ( <i>bilateral</i> ), frontal inferior triangularis ( <i>bilateral</i> ), frontal inferior orbital ( <i>bilateral</i> ), rolandic operculum ( <i>bilateral</i> ), supplementary motor area ( <i>bilateral</i> ), olfactory cortex ( <i>bilateral</i> ), frontal superior medial ( <i>bilateral</i> ), frontal medial orbital ( <i>bilateral</i> ), gyrus rectus ( <i>bilateral</i> ), medial OFC ( <i>bilateral</i> ), anterior OFC ( <i>left</i> ), posterior OFC ( <i>bilateral</i> ), lateral OFC ( <i>bilateral</i> ), insula ( <i>bilateral</i> ), ACC ( <i>bilateral</i> ), MCC ( <i>bilateral</i> ), hippocampus ( <i>bilateral</i> ), parahippocampal gyrus ( <i>bilateral</i> ), amygdala ( <i>bilateral</i> ), postcentral gyrus ( <i>bilateral</i> ), parietal superior ( <i>bilateral</i> ), parietal inferior ( <i>bilateral</i> ), supramarginal gyrus ( <i>bilateral</i> ), precuneus ( <i>bilateral</i> ), paracentral lobule ( <i>bilateral</i> ), caudate ( <i>bilateral</i> ), putamen ( <i>bilateral</i> ), pallidum ( <i>bilateral</i> ), thalamus ( <i>bilateral</i> ), Heschl's gyrus ( <i>bilateral</i> ), temporal superior ( <i>bilateral</i> ), temporal pole superior ( <i>bilateral</i> ), temporal middle ( <i>bilateral</i> ), temporal pole middle ( <i>bilateral</i> ), temporal inferior ( <i>left</i> ) | 1, 2, 3, 4, 5, 6, 7, 8, 9, 10, 11, 20, 21, 22, 23, 24, 25, 27, 28, 32, 34, 35, 36, 37, 38, 40, 41, 42, 43, 44, 45, 46, 47, 48 | -54 | -24 | 14 | 26.810  |
| AIC ( <i>left</i> ) |                                                                                                                                                                                                                                                                                                                                                                                                                                                                                                                                                                                                                                                                                                                                                                                                                                                                                                                                                                                                                                                                                                                                                                                                                                                                                                                                                                                                                                                                                          |                                                                                                                               |     |     |    |         |
| 2                   | MCC ( <i>bilateral</i> ), PCC ( <i>bilateral</i> ), calcarine cortex ( <i>bilateral</i> ), cuneus ( <i>bilateral</i> ), lingual gyrus ( <i>bilateral</i> ), occipital superior ( <i>bilateral</i> ), occipital                                                                                                                                                                                                                                                                                                                                                                                                                                                                                                                                                                                                                                                                                                                                                                                                                                                                                                                                                                                                                                                                                                                                                                                                                                                                           | 7, 17, 18, 19, 21, 22, 23, 26, 27, 29,                                                                                        | 38  | -80 | 34 | -10.228 |

|                      |                                                                                                                                                                                                                                                                                                                                                                                                                                                                                                                                                                                                                                   |                                                                                                                        |     |     |     |        |
|----------------------|-----------------------------------------------------------------------------------------------------------------------------------------------------------------------------------------------------------------------------------------------------------------------------------------------------------------------------------------------------------------------------------------------------------------------------------------------------------------------------------------------------------------------------------------------------------------------------------------------------------------------------------|------------------------------------------------------------------------------------------------------------------------|-----|-----|-----|--------|
|                      | middle ( <i>bilateral</i> ), occipital inferior ( <i>right</i> ), fusiform gyrus ( <i>right</i> ), parietal superior ( <i>bilateral</i> ), parietal inferior ( <i>bilateral</i> ), angular gyrus ( <i>bilateral</i> ), precuneus ( <i>bilateral</i> ), temporal superior ( <i>right</i> ), temporal middle ( <i>bilateral</i> ), temporal inferior ( <i>right</i> ), cerebellum IV/V ( <i>left</i> ) <sup>1</sup> , vermis III <sup>1</sup> , vermis IV/V <sup>1</sup>                                                                                                                                                            | 30, 37, 39, 40, 41, 48                                                                                                 |     |     |     |        |
| 3                    | Frontal superior ( <i>left</i> ), frontal middle ( <i>left</i> ), frontal superior medial ( <i>left</i> )                                                                                                                                                                                                                                                                                                                                                                                                                                                                                                                         | 6, 8, 9, 32, 44, 46                                                                                                    | -30 | 16  | 62  | -8.518 |
| 4                    | Frontal superior ( <i>right</i> ), frontal superior medial ( <i>bilateral</i> ), frontal medial orbital ( <i>bilateral</i> ), gyrus rectus ( <i>bilateral</i> ), medial OFC ( <i>bilateral</i> ), anterior OFC ( <i>bilateral</i> )                                                                                                                                                                                                                                                                                                                                                                                               | 10, 11                                                                                                                 | 2   | 68  | -6  | -5.892 |
| 5                    | Temporal middle ( <i>right</i> ), temporal inferior ( <i>right</i> )                                                                                                                                                                                                                                                                                                                                                                                                                                                                                                                                                              | 20, 21                                                                                                                 | 58  | -8  | -26 | -5.389 |
| 6                    | Temporal middle ( <i>right</i> ), temporal inferior ( <i>right</i> )                                                                                                                                                                                                                                                                                                                                                                                                                                                                                                                                                              | 20, 21, 37                                                                                                             | 62  | -36 | -14 | -5.386 |
| 7                    | Frontal superior ( <i>right</i> ), frontal middle ( <i>right</i> )                                                                                                                                                                                                                                                                                                                                                                                                                                                                                                                                                                | 45, 46                                                                                                                 | 26  | 44  | 22  | 5.032  |
| 8                    | Precentral gyrus ( <i>right</i> ), frontal middle ( <i>right</i> ), postcentral gyrus ( <i>right</i> )                                                                                                                                                                                                                                                                                                                                                                                                                                                                                                                            | 3, 4, 6                                                                                                                | 42  | -16 | 38  | 5.029  |
| 9                    | Cerebellum IV/V ( <i>left</i> ), cerebellum VI ( <i>left</i> )                                                                                                                                                                                                                                                                                                                                                                                                                                                                                                                                                                    | 19 <sup>3</sup> , 37 <sup>3</sup>                                                                                      | -10 | -56 | -22 | 4.272  |
| 10                   | - <sup>4</sup>                                                                                                                                                                                                                                                                                                                                                                                                                                                                                                                                                                                                                    | 48                                                                                                                     | 26  | -4  | 34  | -6.024 |
| AIC ( <i>right</i> ) | 1 Precentral gyrus ( <i>bilateral</i> ), frontal superior ( <i>bilateral</i> ), frontal middle ( <i>bilateral</i> ), frontal inferior operculum ( <i>bilateral</i> ), frontal inferior triangularis ( <i>bilateral</i> ), frontal inferior orbital ( <i>bilateral</i> ), rolandic operculum ( <i>bilateral</i> ), supplementary motor area ( <i>bilateral</i> ), olfactory cortex ( <i>bilateral</i> ), frontal superior medial ( <i>bilateral</i> ), gyrus rectus ( <i>bilateral</i> ), medial OFC ( <i>bilateral</i> ), anterior OFC ( <i>right</i> ), posterior OFC ( <i>bilateral</i> ), lateral OFC ( <i>right</i> ), insula | 1, 2, 3, 4, 5, 6, 7, 8, 9, 11, 18, 19, 20, 21, 22, 23, 24, 25, 28, 30, 32, 34, 35, 36, 37, 38, 40, 41, 42, 43, 44, 45, | 54  | 12  | 2   | 27.474 |

|    |   |                                                                                                           |                      |    |     |    |        |
|----|---|-----------------------------------------------------------------------------------------------------------|----------------------|----|-----|----|--------|
| 1  |   |                                                                                                           |                      |    |     |    |        |
| 2  |   |                                                                                                           |                      |    |     |    |        |
| 3  |   |                                                                                                           |                      |    |     |    |        |
| 4  |   |                                                                                                           |                      |    |     |    |        |
| 5  |   |                                                                                                           |                      |    |     |    |        |
| 6  |   |                                                                                                           |                      |    |     |    |        |
| 7  |   |                                                                                                           |                      |    |     |    |        |
| 8  |   |                                                                                                           |                      |    |     |    |        |
| 9  |   |                                                                                                           |                      |    |     |    |        |
| 10 |   |                                                                                                           |                      |    |     |    |        |
| 11 |   |                                                                                                           |                      |    |     |    |        |
| 12 |   |                                                                                                           |                      |    |     |    |        |
| 13 |   |                                                                                                           |                      |    |     |    |        |
| 14 |   |                                                                                                           |                      |    |     |    |        |
| 15 |   |                                                                                                           |                      |    |     |    |        |
| 16 |   |                                                                                                           |                      |    |     |    |        |
| 17 |   |                                                                                                           |                      |    |     |    |        |
| 18 |   |                                                                                                           |                      |    |     |    |        |
| 19 |   |                                                                                                           |                      |    |     |    |        |
| 20 |   |                                                                                                           |                      |    |     |    |        |
| 21 |   |                                                                                                           |                      |    |     |    |        |
| 22 |   |                                                                                                           |                      |    |     |    |        |
| 23 | 2 | Frontal superior ( <i>right</i> ), frontal middle ( <i>right</i> ), supplementary motor area              | 6, 8, 9, 10, 11, 24, | 10 | 12  | 38 | 13.408 |
| 24 |   | ( <i>right</i> ), frontal superior medial ( <i>right</i> ), frontal medial orbital ( <i>right</i> ), ACC  | 25, 32, 48           |    |     |    |        |
| 25 |   | ( <i>bilateral</i> ), MCC ( <i>right</i> )                                                                |                      |    |     |    |        |
| 26 |   |                                                                                                           |                      |    |     |    |        |
| 27 |   |                                                                                                           |                      |    |     |    |        |
| 28 |   |                                                                                                           |                      |    |     |    |        |
| 29 | 3 | MCC ( <i>bilateral</i> ), PCC ( <i>bilateral</i> ), calcarine cortex ( <i>bilateral</i> ), cuneus         | 7, 17, 18, 19, 21,   | 34 | -76 | 46 | -8.832 |
| 30 |   | ( <i>right</i> ), lingual gyrus ( <i>bilateral</i> ), occipital superior ( <i>bilateral</i> ), occipital  | 22, 23, 26, 27, 29,  |    |     |    |        |
| 31 |   | middle ( <i>bilateral</i> ), occipital inferior ( <i>right</i> ), parietal superior ( <i>bilateral</i> ), | 30, 37, 39, 40       |    |     |    |        |
| 32 |   | parietal inferior ( <i>left</i> ), angular gyrus ( <i>bilateral</i> ), precuneus ( <i>bilateral</i> ),    |                      |    |     |    |        |
| 33 |   | temporal superior ( <i>right</i> ), temporal middle ( <i>bilateral</i> ), cerebellum IV/V                 |                      |    |     |    |        |
| 34 |   | ( <i>left</i> ), vermis III <sup>1</sup> , vermis IV/V <sup>1</sup>                                       |                      |    |     |    |        |
| 35 |   |                                                                                                           |                      |    |     |    |        |
| 36 |   |                                                                                                           |                      |    |     |    |        |
| 37 |   |                                                                                                           |                      |    |     |    |        |
| 38 |   |                                                                                                           |                      |    |     |    |        |
| 39 |   |                                                                                                           |                      |    |     |    |        |
| 40 |   |                                                                                                           |                      |    |     |    |        |
| 41 |   |                                                                                                           |                      |    |     |    |        |
| 42 |   |                                                                                                           |                      |    |     |    |        |
| 43 |   |                                                                                                           |                      |    |     |    |        |
| 44 |   |                                                                                                           |                      |    |     |    |        |
| 45 |   |                                                                                                           |                      |    |     |    |        |
| 46 |   |                                                                                                           |                      |    |     |    |        |
| 47 |   |                                                                                                           |                      |    |     |    |        |
| 48 |   |                                                                                                           |                      |    |     |    |        |
| 49 |   |                                                                                                           |                      |    |     |    |        |

|   |                                                                                                                                                                                                                                                                                                      |                |     |     |     |        |
|---|------------------------------------------------------------------------------------------------------------------------------------------------------------------------------------------------------------------------------------------------------------------------------------------------------|----------------|-----|-----|-----|--------|
| 4 | Frontal superior ( <i>bilateral</i> ), frontal middle ( <i>left</i> ), frontal superior medial ( <i>bilateral</i> ), frontal medial orbital ( <i>bilateral</i> ), gyrus rectus ( <i>bilateral</i> ), medial OFC ( <i>bilateral</i> ), anterior OFC ( <i>bilateral</i> ), lateral OFC ( <i>left</i> ) | 10, 11, 46, 47 | 2   | 68  | -2  | -7.839 |
| 5 | Olfactory cortex ( <i>left</i> ), gyrus rectus ( <i>left</i> ), medial OFC ( <i>left</i> ), caudate ( <i>left</i> ), putamen ( <i>left</i> ), pallidum ( <i>left</i> )                                                                                                                               | 11, 25, 48     | -14 | 20  | -18 | 7.384  |
| 6 | Temporal middle ( <i>right</i> ), temporal inferior ( <i>right</i> )                                                                                                                                                                                                                                 | 20, 21         | 62  | -8  | -22 | -6.526 |
| 7 | Hippocampus ( <i>left</i> ), parahippocampal gyrus ( <i>left</i> ), fusiform gyrus ( <i>left</i> ), temporal inferior ( <i>left</i> )                                                                                                                                                                | 20, 37         | -38 | -28 | -18 | -6.081 |
| 8 | Frontal middle ( <i>left</i> )                                                                                                                                                                                                                                                                       | 9, 45, 46      | -34 | 44  | 30  | 5.537  |

1. Although automated anatomical labeling indicated that the cerebellum was part of this cluster, visual inspection suggested otherwise; i.e., some voxels were located in the cerebellum according to the AAL atlas, but seemed not to be part of this anatomical region when superimposed on the standard MNI brain.
2. Although automated anatomical labeling indicated that the fusiform gyrus was part of this cluster, visual inspection suggested otherwise; i.e., some voxels were located in the fusiform gyrus according to the AAL atlas, but seemed not to be part of this anatomical region when superimposed on the standard MNI brain. Similarly, although Brodmann labeling indicated that Brodmann area 37 (corresponding to the fusiform gyrus) was part of the cluster, visual inspection again suggested otherwise.
3. Although the Brodmann atlas indicated that these Brodmann areas were part of the cluster, visual inspection suggested otherwise; i.e., some voxels were located at the edge of the region defined by the Brodmann atlas, however the edges of these Brodmann seemed to extend beyond the border of the actual anatomical region when superimposed on the standard MNI brain.
4. Visual inspection suggested that this cluster was located in the white matter. Hence, the cluster did not yield any brain area when subjected to automated anatomical labeling.
